# Supplementary material for: Glioma invasion mediated by the p75 neurotrophin receptor (p75NTR/CD271) requires regulated interaction with PDLIM1
Source: PubMed Central journal article supplement — Oncogene. 2015 Jun 29;35(11):1411–22. doi: 10.1038/onc.2015.199 (PMC4800290; doi:10.1038/onc.2015.199), 2015-06-29

# Supplementary figure S1

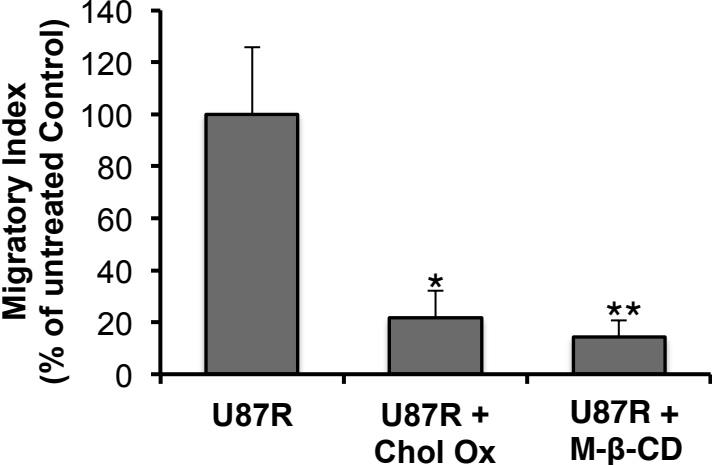

# Supplementary figure S2

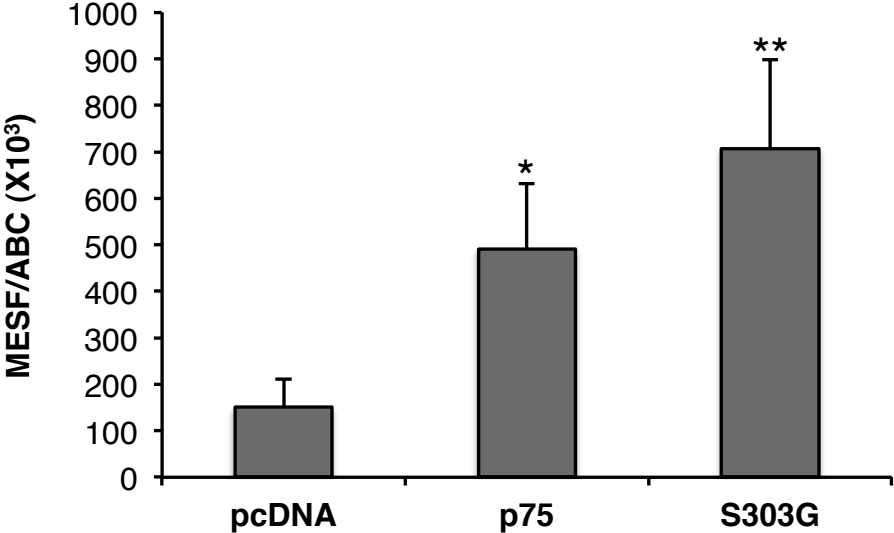

# Supplementary figure S3

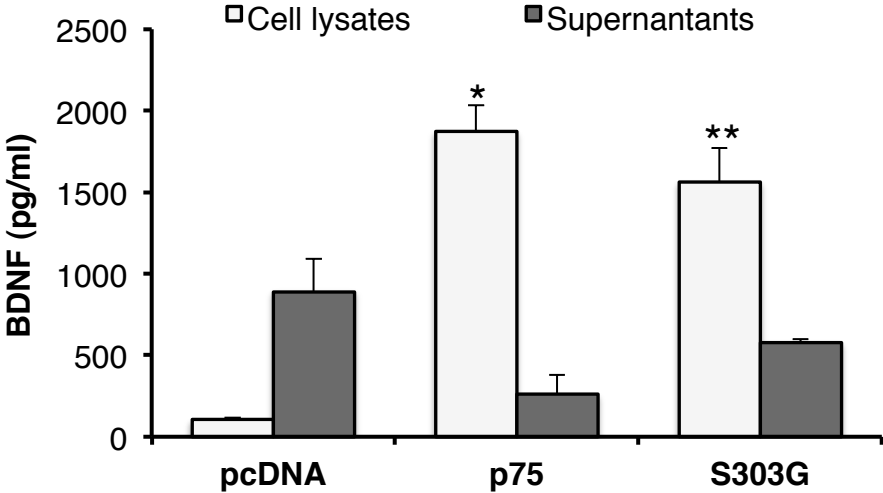

# Supplementary figure S4

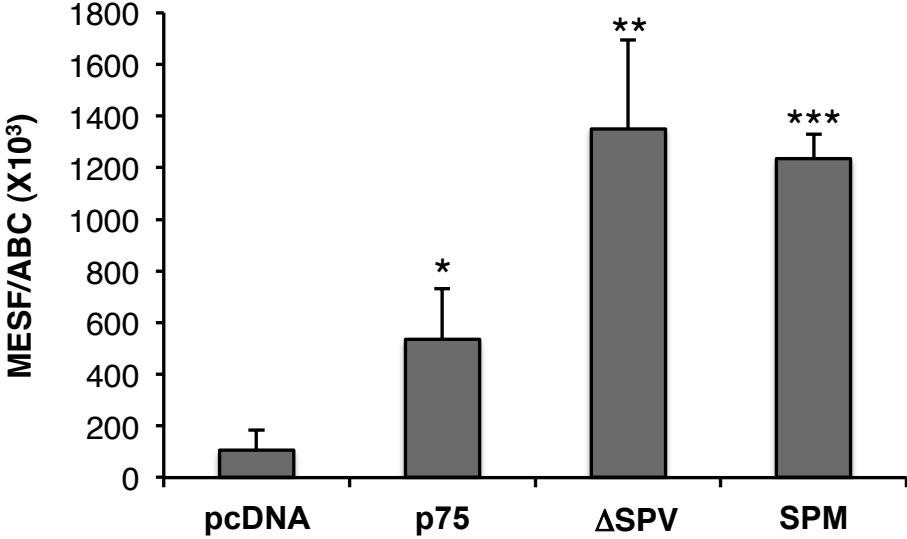

# Supplementary figure S5

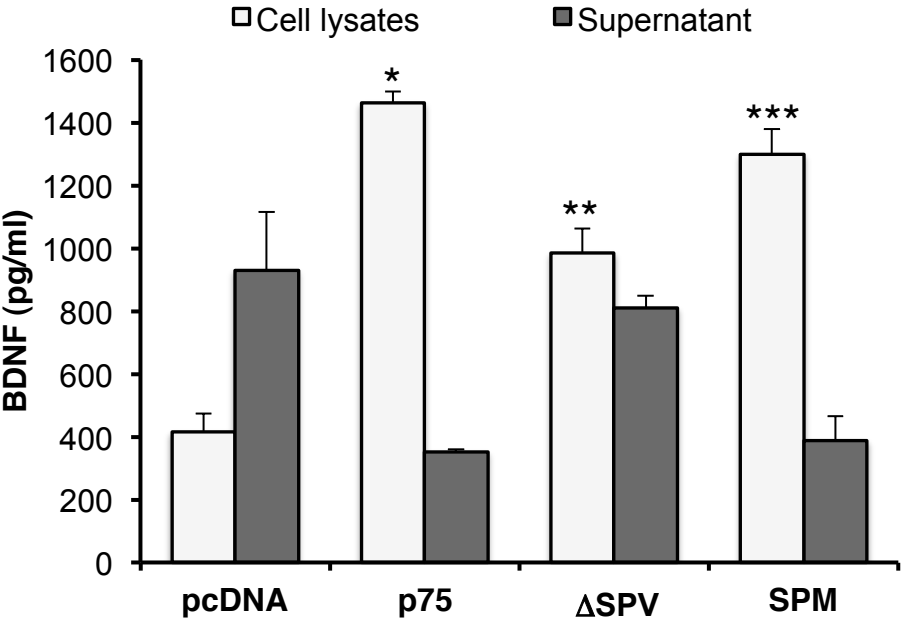

# Supplementary figure S6

MS/MS Fragmentation of **ERVTPPEGYEVVTVFPK**  
Found in **PDL1\_HUMAN**, PDZ and LIM domain protein 1 (Elfin) (LIM domain protein CLP-36) (C-terminal LIM domain protein 1) - Homo sapiens (Human)  
Match to Query 1233: 1946.027292 from(649.683040,3+) intensity(1488.2238)

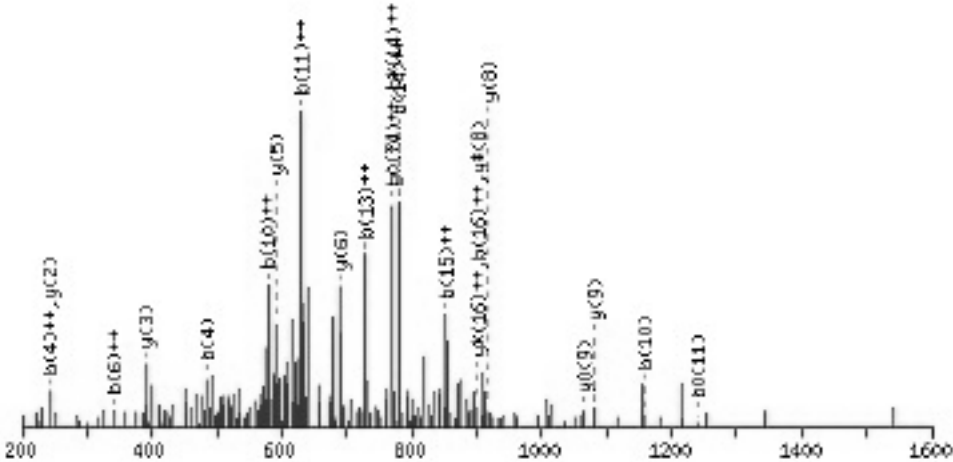

# Supplementary figure S7

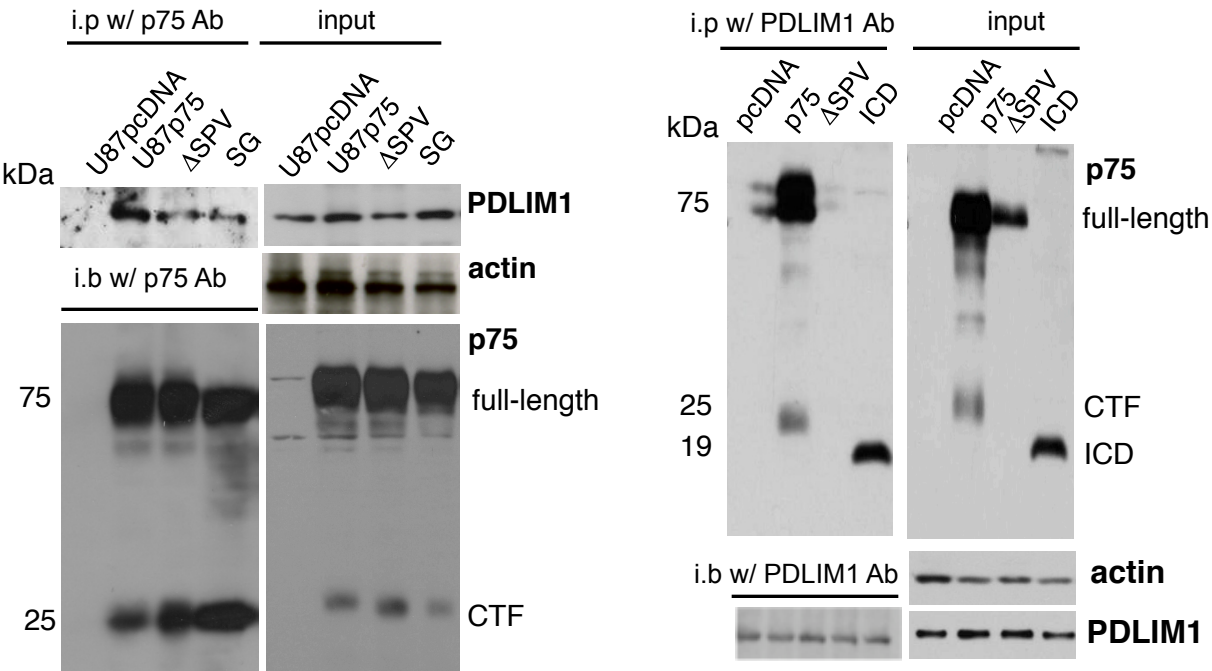

# Supplementary figure S8

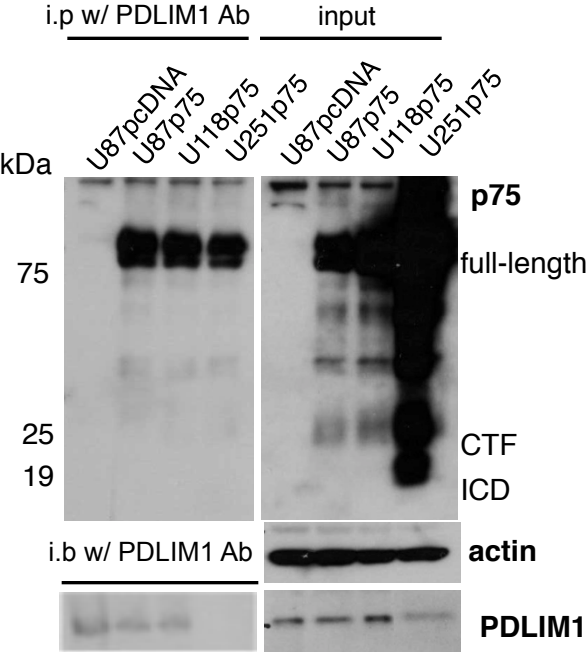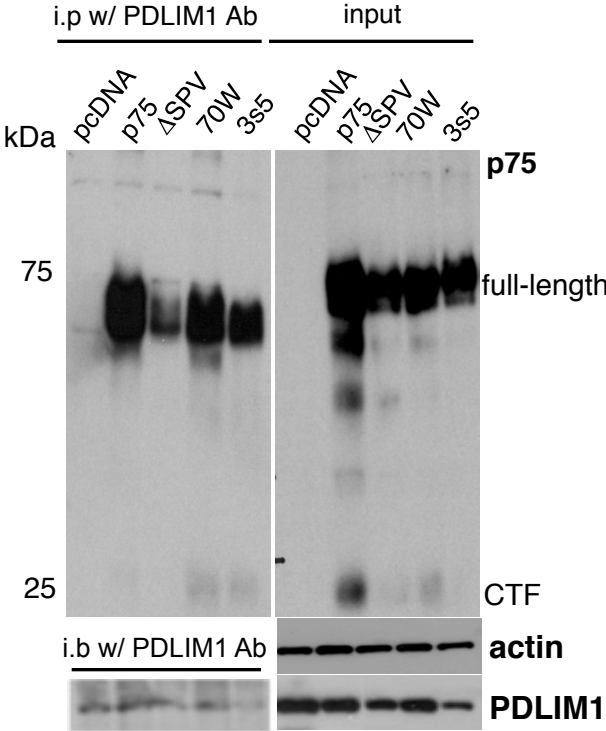

Supplement: onc2015199x1.pdf [file onc2015199x1.pdf]
