# Supplementary material for: Glioma invasion mediated by the p75 neurotrophin receptor (p75NTR/CD271) requires regulated interaction with PDLIM1
Source: PubMed Central journal article supplement — Oncogene. 2015 Jun 29;35(11):1411–22. doi: 10.1038/onc.2015.199 (PMC4800290; doi:10.1038/onc.2015.199), 2015-06-29
Supplement: onc2015199x2.pdf [file onc2015199x2.pdf]

**Glioma invasion mediated by the p75<sup>NTR</sup>/CD271 requires regulated interaction with PDLIM1**

Bo Young Ahn, Roberta F.G. Saldanha-Gama, Jennifer J. Rahn, Xiaoguang Hao, Jun Zhang, Ngoc-Ha Dang, Mana Alshehri, Stephen M. Robbins and Donna L. Senger

**Supplementary Figure Legends**

**Supplementary Figure S1.** Depletion of plasma membrane cholesterol using cholesterol oxidase or Methyl  $\beta$  cyclodextran abrogates glioma invasion. Histogram shows the number of cells that migrated through a collagen coated transwells in the absence (no treatment) or presence of cholesterol oxidase (Chol Ox) or Methyl  $\beta$  cyclodextran (M- $\beta$ -CD). Asterisks (\*,\*\*) indicate  $p > 0.01$  versus non-treated U87R cells (one-way ANOVA with the Neuman-Keuls post-test).

**Supplementary Figure S2.** Flow cytometric analysis of p75S303G expressing glioma cells using a monoclonal antibody specific to the extracellular domain (ECD) of p75<sup>NTR</sup> confirmed plasma membrane expression and correct topography. Asterisks (\*, \*\*) indicate  $p < 0.01$  as compared to U87pcDNA (one-way ANOVA with the Neuman-Keuls post-test). The MESF units represented the antibody binding capacity (ABC). (MESF: the molecules of equivalent soluble fluorochrome).

**Supplementary Figure S3.** Glioma-derived-BDNF was found localized to the cell membrane of cells expressing wild type or mutant (S303G) p75<sup>NTR</sup>. BDNF present in the conditioned medium or cell lysates were analyzed by ELISA. BDNF was found in the cell-associated fraction of U87 cells expressing both wild type and mutant p75<sup>NTR</sup> (S303G), but not in the U87pcDNA cells. Asterisks (\*, \*\*) indicate  $p < 0.01$  as compared to U87pcDNA (one-way ANOVA with the Neuman-Keuls post-test).

**Supplementary Figure S4.** Flow cytometric analysis of U87 glioma cells expressing PDZ-binding domain mutants ( $\Delta$ SPV; SPM) of p75<sup>NTR</sup> using a monoclonal antibody specific to the extracellular domain (ECD) of p75<sup>NTR</sup> confirmed plasma membrane expression and correct topography. Asterisk (\*) indicate  $p > 0.05$  and asterisks (\*\*, \*\*\*)

indicate  $p > 0.01$  versus U87 pcDNA cells (one-way ANOVA with the Neuman-Keuls post-test).

**Supplementary Figure S5.** Glioma-derived-BDNF was found localized to the cell membrane of cells expressing wild type or PDZ-binding domain mutants ( $\Delta$ SPV; SPM) of p75<sup>NTR</sup>. BDNF present in conditioned media, or cell lysates, was analyzed by ELISA. Increased levels of BDNF were found in the cell-associated fraction of U87 cells expressing both wild-type and mutant p75<sup>NTR</sup> ( $\Delta$ SPV; SPM), as compared to the U87pcDNA cells. Asterisk (\*) indicate  $p > 0.01$  and double asterisks (\*\*, \*\*\*) indicate  $p > 0.05$  versus non-treated U87pcDNA (one-way ANOVA with the Neuman-Keuls post-test).

**Supplementary Figure S6.** Identification of PDLIM1 by LC-MS/MS analysis. Using Mascot software v2.3, PDLIM1 was identified from the MS/MS spectrum. Shown is the peptide fragment identifying PDLIM1 as a p75<sup>NTR</sup> interacting protein.

**Supplementary Figure S7.** p75<sup>NTR</sup> and PDLIM1 interaction was confirmed by immunoprecipitation. U87 glioma cells expressing empty vector (pcDNA), full-length p75<sup>NTR</sup> (U87p75) or the mutant p75<sup>NTR</sup> receptors  $\Delta$ SPV or S303G (SG) were immunoprecipitated using a p75<sup>NTR</sup> antibody followed by Western blot analysis for PDLIM1 and p75<sup>NTR</sup> (left panel). Input cell lysates were assessed by Western blot analysis for expression of p75<sup>NTR</sup> and PDLIM1. Actin was used as a protein loading control. Right panel shows immunoprecipitation of U87 glioma cells expressing an empty vector (pcDNA), p75<sup>NTR</sup>,  $\Delta$ SPV, or the intracellular domain of p75<sup>NTR</sup> (ICD) with a PDLIM1 antibody followed by Western blot analysis for p75<sup>NTR</sup>. Expression of the p75<sup>NTR</sup> intracellular domain (ICD) alone is sufficient for PDLIM1 binding. Input cell lysates were assessed by Western blot analysis for expression of p75<sup>NTR</sup> and PDLIM1. Actin was used as a protein loading control.

**Supplementary Figure S8.** PDLIM1 associates with p75<sup>NTR</sup> via the C-terminal PDZ-binding motif in patient-derived primary glioma and human metastatic melanoma. Immunoprecipitation with a PDLIM1 antibody co-precipitated p75<sup>NTR</sup> in p75<sup>NTR</sup>-expressing glioma cell lines (U87, U118, U251) (left panel). U87 glioma cells expressing

empty vector (pcDNA), p75<sup>NTR</sup> or ΔSPV are also shown. Input cell lysates were assessed by Western blot analysis for expression of p75<sup>NTR</sup> and PDLIM1. Actin was used as a protein loading control. Interaction of PDLIM1 with p75<sup>NTR</sup> was observed in human metastatic melanoma cell lines 70W and 3S5 (right panel).

## **Supplementary Materials and Methods**

### **Depletion of lipid raft**

To assess the role of lipid rafts in glioma invasion, 1.8 U/ml of Cholesterol oxidase or 5 mM of Methyl β cyclodextran were added to the upper chambers containing the cells while the invasion assays was performed. The treated cells were incubated for 4 hrs under normal culture conditions, and migrated cells were counted.

### **Quantification of p75<sup>NTR</sup> cell surface expression**

Expression of p75<sup>NTR</sup> in U87 cells expressing the full length or mutant p75<sup>NTR</sup> proteins was measured using fluorescently labeled anti-p75<sup>NTR</sup> monoclonal antibody and quantified by comparison with a standard curve generated with Simply Cellular anti-mouse IgG microspheres (Bangs Laboratories) analyzed in parallel according to manufacturer instructions. This analysis assesses antibody binding capacity (ABC) corresponding to the total number of monoclonal antibody binding sites/cell.

### **ELISA**

1 x 10<sup>5</sup> cells of U87 glioma cells were allowed to condition culture media for 4 days. The conditioned media was then collected, concentrated by centrifugation using Amicon-Ultra-3 (Millipore). The remaining cells were washed with ice-cold PBS, and total cellular lysates were extracted as described for the Western blot analysis. Protein quantification was performed using the Brad-Ford assay (Bio-Rad), and BDNF ELISA (R&D Systems) was performed as per the company protocol. Briefly, MaxiSorp ELISA plates (Nalge Nunc International) were coated with monoclonal anti-human BDNF (R&D

Systems), nonspecific binding was blocked, and serial dilutions of recombinant human BDNF (R&D Systems), conditioned media or cell lysate was added. Bound antigen was detected using the corresponding biotinylated antibody, streptavidin-HRP, and a tetramethylbenzidine substrate (R&D Systems). Absorbance was measured at 450 nm.

### **Cell lines**

Human Metastatic melanoma cells 3S5 and 70W (98-99) were obtained from Dr. Robert Kerbel Mount Sinai Research Institute, Toronto Canada. Glioma cell lines (U118, U251) and melanoma cell lines were grown in Dulbecco's modified eagle's medium (DMEM, Gibco-BRL, Bethesda, MD, USA) supplemented with 10% fetal bovine serum (FBS, Gibco-BRL) at 37°C in a humidified 5% CO<sub>2</sub> incubator. Stable transfectants of glioma cells were maintained in identical media with 400 µg/ml of G418 (Sigma, St. Louis, MO, USA). Glioma cell lines ectopically expressing p75<sup>NTR</sup> were established as described previously (Johnston et al, 2007).
